# Supplementary material for: Green fluorescent genetically encoded calcium indicator based on calmodulin/M13-peptide from fungi
Source: PubMed Central journal article supplement (PMC5570312; doi:10.1371/journal.pone.0183757), 2017-08-24
Supplement: pone.0183757.s001.pdf [file pone.0183757.s001.pdf]

Supporting information for:

## **Green fluorescent genetically encoded calcium indicator based on calmodulin/M13-peptide from fungi**

Natalia V. Barykina<sup>1,2</sup>, Oksana M. Subach<sup>1,3</sup>, Kiryl D. Piatkevich<sup>4</sup>, Erica E. Jung<sup>4</sup>, Aleksey Y. Malyshev<sup>5</sup>, Ivan V. Smirnov<sup>5,6</sup>, Andrey O. Bogorodskiy<sup>1</sup>, Valentin I. Borshchevskiy<sup>1</sup>, Anna M. Varizhuk<sup>7,8</sup>, Galina E. Pozmogova<sup>7</sup>, Edward S. Boyden<sup>4,9</sup>, Konstantin V. Anokhin<sup>2,3,10</sup>, Grigori N. Enikolopov<sup>1,11,12\*</sup>, & Fedor V. Subach<sup>1\*</sup>

<sup>1</sup>Moscow Institute of Physics and Technology, Dolgoprudny, Moscow Region, Russia

<sup>2</sup>P.K. Anokhin Institute of Normal Physiology of RAMS, Moscow, Russia

<sup>3</sup>National Research Center "Kurchatov Institute", Moscow, Russia

<sup>4</sup>MIT Media Lab, Massachusetts Institute of Technology, Cambridge, MA, USA

<sup>5</sup>Institute of Higher Nervous Activity and Neurophysiology of RAS, Moscow, Russia

<sup>6</sup>Medico-Biological Faculty, N.I. Pirogov Russian National Research Medical University, Moscow, Russia

<sup>7</sup>Federal Research and Clinical Center of Physical-Chemical Medicine of Federal Medical Biological Agency, Moscow, Russia

<sup>8</sup>Engelhardt Institute of Molecular Biology RAS, Moscow, Russia

<sup>9</sup>MIT McGovern Institute for Brain Research, MIT, Cambridge, MA, USA

<sup>10</sup>Lomonosov Moscow State University, Moscow, Russia

<sup>11</sup>Department of Anesthesiology, Stony Brook University Medical Center, NY, USA

<sup>12</sup>Center for Developmental Genetics, Stony Brook University, NY, USA

\*Correspondence and requests for materials should be addressed to F.V.S. (email: [subach.fv@mipt.ru](mailto:subach.fv@mipt.ru)) or G.N.E. (email: [Grigori.Enikolopov@stonybrookmedicine.edu](mailto:Grigori.Enikolopov@stonybrookmedicine.edu))

# S1 Supporting information

Figure A. Alignment of the amino acid sequences for CaMs and peptides from CaM-dependent kinases and calcineurins found in different species.

Figure B. Alignment of the amino acid sequences for original library and FGCaMP calcium indicator.

Figure C. pH dependence of absorbance for the purified FGCaMP indicator.

Figure D. Size-exclusion chromatography for FGCaMP protein.

Figure E.  $\text{Ca}^{2+}$  titration curves for FGCaMP and GCaMP6s in the absence or presence of 1 mM  $\text{MgCl}_2$ .

Figure F. Kinetic curves obtained from  $\text{Ca}^{2+}$ -association experiments.

Figure G. Detailed analysis of the onset kinetics for  $\text{Ca}^{2+}$ -binding.

Figure H. Alignment of the amino acid sequences of M13-like peptides and CaMs from FGCaMP and the other calcium indicators.

Figure I.  $\text{Ca}^{2+}$  titration curves for FGCaMP mutants.

Figure J.  $\text{Ca}^{2+}$  titration curves for FGCaMP2 mutants with mutations in CaM part.

Figure K.  $\text{Ca}^{2+}$  titration curves for FGCaMP3 variants with mutations in the M13-like peptide.

Figure L. Reversible changes in the mobile fraction of the FGCaMP indicator at the transition from high to low  $\text{Ca}^{2+}$  concentrations in HeLa Kyoto cells studied by FRAP experiments.

Figure M. Fluorescence changes in response to the external electric field in cultured neurons expressing FGCaMP indicator.

Figure N. confocal ratiometric calcium imaging with FGCaMP during 4-AP induced neuronal activity in paralyzed larvae embedded in ultra-low-melting agarose gel.

Figure O. Lightsheet ratiometric calcium imaging with FGCaMP during 4-AP induced neuronal activity in paralyzed larvae embedded in ultra-low-melting agarose gel.

Table A. Brightness and contrasts for FGCaMP and other ratiometric green and yellow GECIs.

Table B.  $K_d$  values and fluorescence contrasts for 402- and 493-forms of FGCaMP and its mutants.

Table C. List of primers.

# A

```
A.niger      1: MADS L TEE Q VSEY KEAFSLFDK DGDG Q I T T K E L G T V M R S L G Q N P S E S E L Q D M I N E V L A D N 60
K.pastoris  1: M S D K L S F A Q I S E F K E A F S L F D Q D D G K I T S K E L G I V M R S L G Q T P T E S E L N D L I R E I D S N T 60
Mus.musculus 1: M A D Q L T E E Q I A E F K E A F S L F D K D G D G T I T T K E L G T V M R S L G Q N P T E A E L Q D M I N E V L A D G 60

A.niger      61: N G T I D F P E F L T M M A R K M K D T D S E E I R E A F K V F D R N N G F I S A A E L R H V M T S I G E K L T D D 120
K.pastoris   61: D G S I D F P E F L T M M A R K M R D S D S Q A E I F E A F R V F D K D G D G K I D K G E L K H V L T S I G E K L T E E 120
Mus.musculus 61: N G T I D F P E F L T M M A R K M K D T D S E E I R E A F R V F D K D G N G Y I S A A E L R H V M T N I G E K L T D E 120

A.niger      121: E V D E M I R E A D Q D G D G R I D Y N E F V Q I M M Q R 149
K.pastoris   121: E V D E M L R E A D T N N D G V I D I K E F S N L L V M K 149
Mus.musculus 121: E V D E M I R E A D I D G D G V N Y E E F V Q M M T A K 149
```

# B

```
A. fumigatus 1: R R T L H K A I - D T V F A I N K L R E G 20
Chicken      1: R R K W Q K T G - H A V F A I G R L S S M 20
K. pastoris  1: - R S K F K Q V I E I V K M Q N R L K N L 20
Mus. musculus 1: R R K W Q K T G - N A V F A I G R L S S M 20
```

# C

```
A. fumigatus 1: - K R R A - I K N K I L A I G F L S R V F Q V L R 23
K. pastoris  1: - K - K V V L R N K I L A I G F V S R M Y Q V L R 23
Mus. musculus 1: R K E V I R N - - K I R A I G F M A R V F S V L R 23
```

**Figure A. Alignment of the amino acid sequences for CaMs and peptides from CaM-dependent kinases and calcineurins found in different species.** (A) Alignment of the amino acid sequences for CaMs from *A. niger*, *K. pastoris*, and *M. musculus*. (B) Alignment of the amino acid sequences for M13-like peptides from CaM-dependent kinases from *A. fumigatus*, chicken, *K. pastoris*, and *M. musculus*. (C) Alignment of the amino acid sequences for calcineurins from *A. fumigatus*, *K. pastoris*, and *M. musculus*. Identical residues are selected with red boxes.



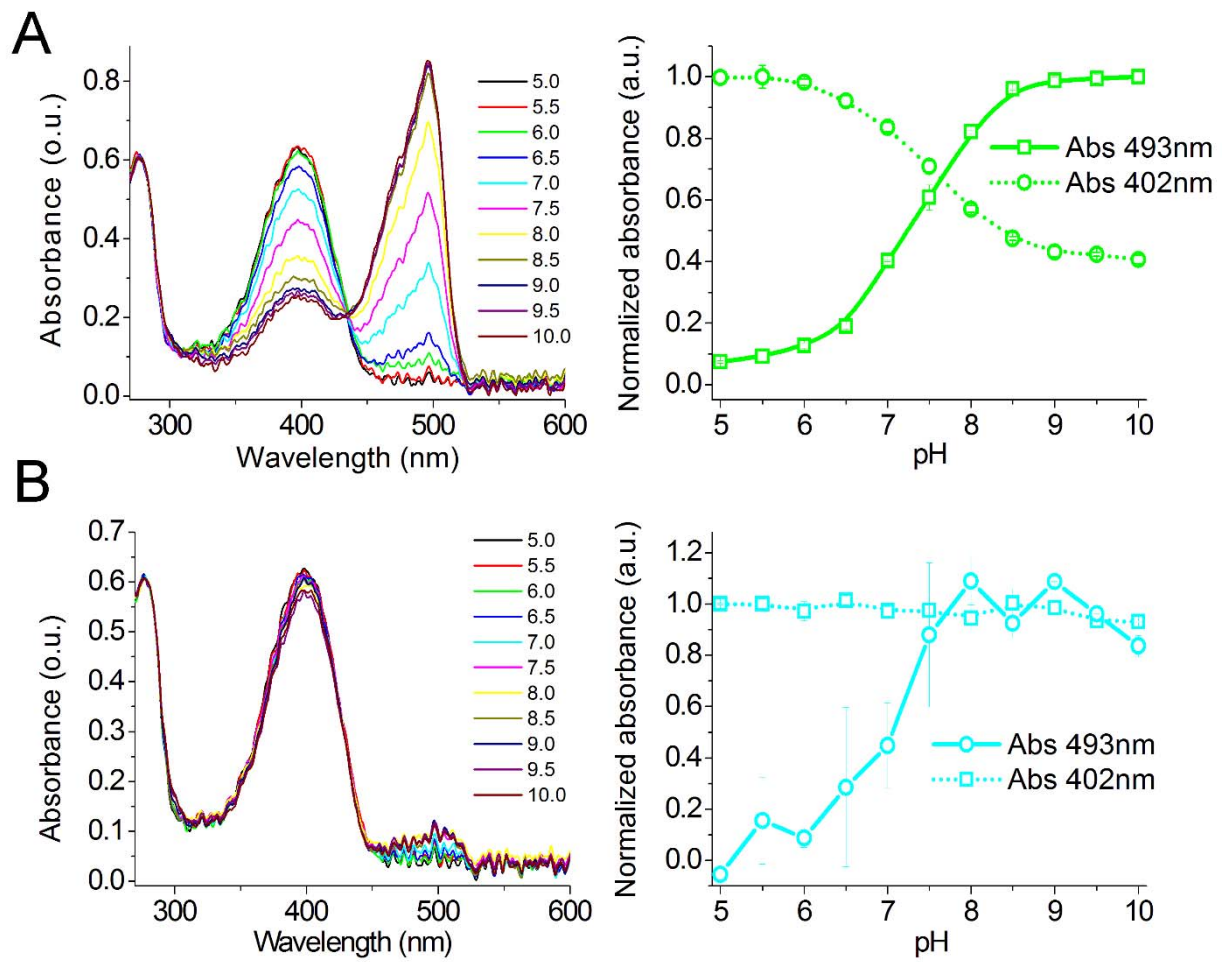

**Figure C. pH dependence of absorbance for the purified FGCaMP indicator.** (A, B) Absorbance spectra (left) and the normalized absorbance at 402 and 493nm (right) for FGCaMP in Ca<sup>2+</sup>-bound (A) and Ca<sup>2+</sup>-free (B) states in the range of pH values of 5-10. Error bars represent the standard deviation.

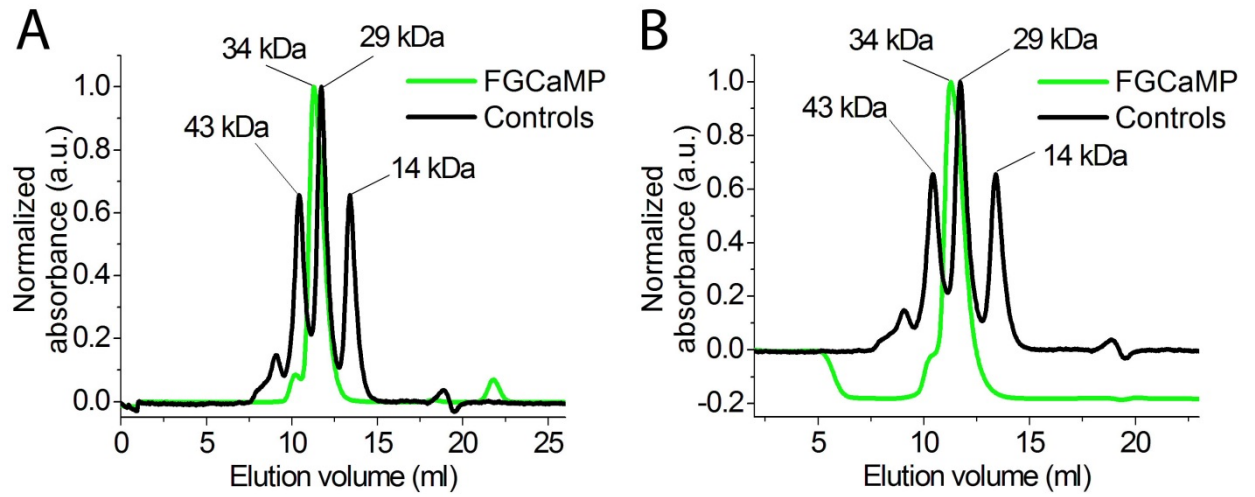

**Figure D. Size-exclusion chromatography for FGCaMP protein.** Fast protein liquid chromatography of FGCaMP in 20 mM Tris-HCl (pH 7.5), 200 mM NaCl buffer supplemented with 2 mM EDTA (A) or in 20 mM Tris-HCl (pH 7.5), 100 mM NaCl buffer supplemented with 1 mM  $\text{CaCl}_2$  (B).

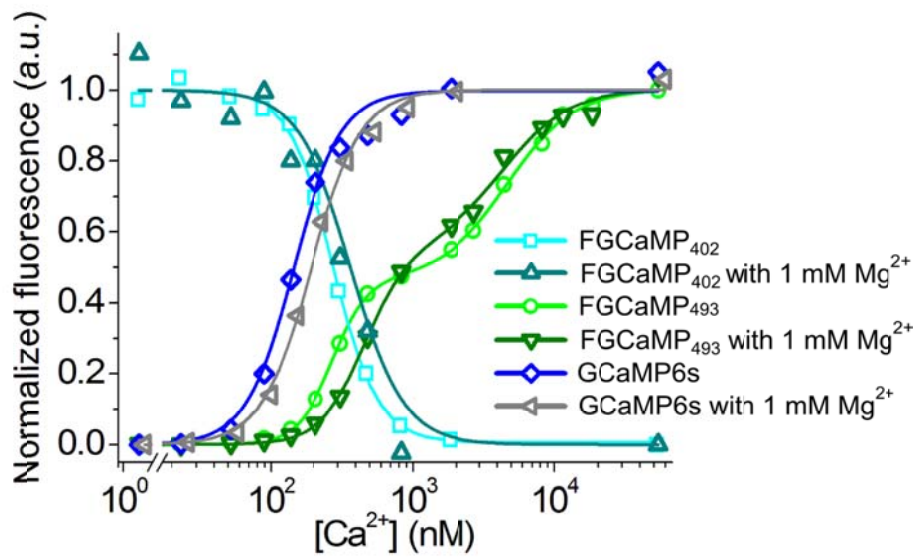

**Figure E.  $\text{Ca}^{2+}$  titration curves for FGCaMP and GCaMP6s in the absence or presence of 1 mM  $\text{MgCl}_2$ .**  $\text{Ca}^{2+}$  titration curves for 402- and 493-forms of FGCaMP were acquired using 402 and 490 nm excitation light, respectively. Fluorescence changes were normalized to maximal and minimal values. Experimental data were fitted to Hill equation or double Hill equation  $y = V_1 \cdot x^{n_1} / (K_{d1}^{n_1} + x^{n_1}) + V_2 \cdot x^{n_2} / (K_{d2}^{n_2} + x^{n_2})$ , respectively.

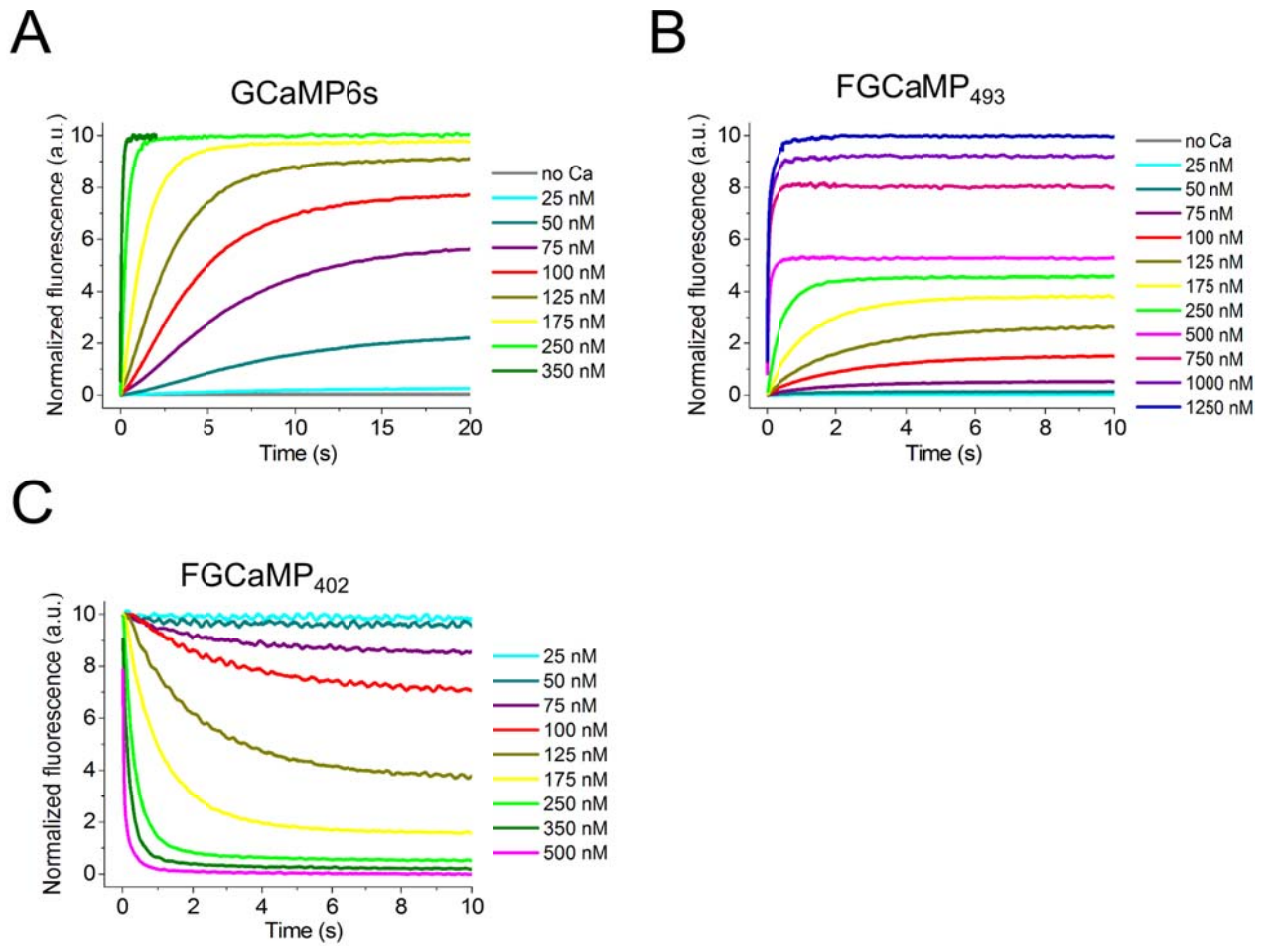

**Figure F. Kinetic curves obtained from  $\text{Ca}^{2+}$ -association experiments.** Fluorescence changes are normalized to  $F_0$  of 0 and  $F_{\text{max}}$  of 10 for GCaMP6s (A) and FGCaMP using excitation at 500 nm (B) and to  $F_0$  of 10 and  $F_{\text{min}}$  of 0 for FGCaMP using excitation at 402 nm (C).  $\text{Ca}^{2+}$  concentrations in the mixing chamber are specified in the figure legends.



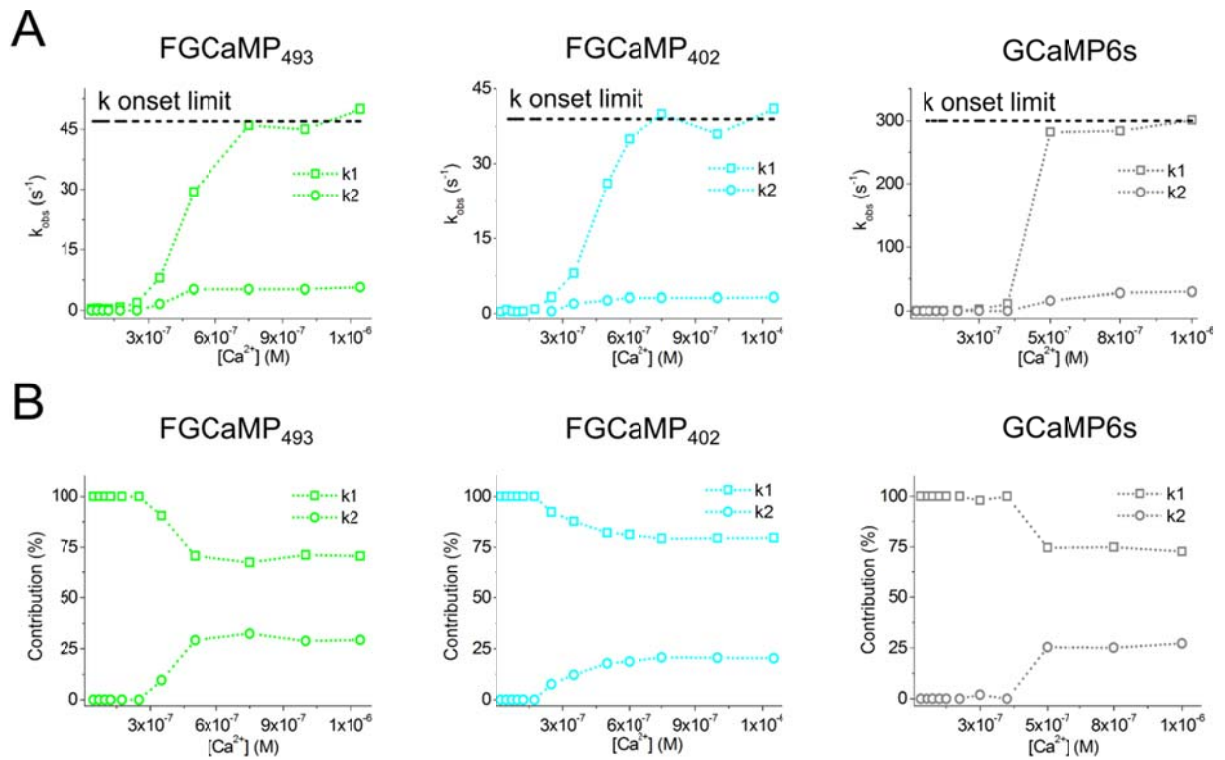

**Figure G. Detailed analysis of the onset kinetics for Ca<sup>2+</sup>-binding.** (A) Observed association rate constants ( $k_1$ ,  $k_2$ ) obtained by fitting the kinetic curves to double exponentials. (B) Relative contributions of the  $k_1$  and  $k_2$  exponentials. Onset rate limit values ( $k^{\text{onset}}$  limit) correspond to saturation levels of the observed association rate constants (at  $> 600\text{-}800$  nM Ca<sup>2+</sup> concentrations).

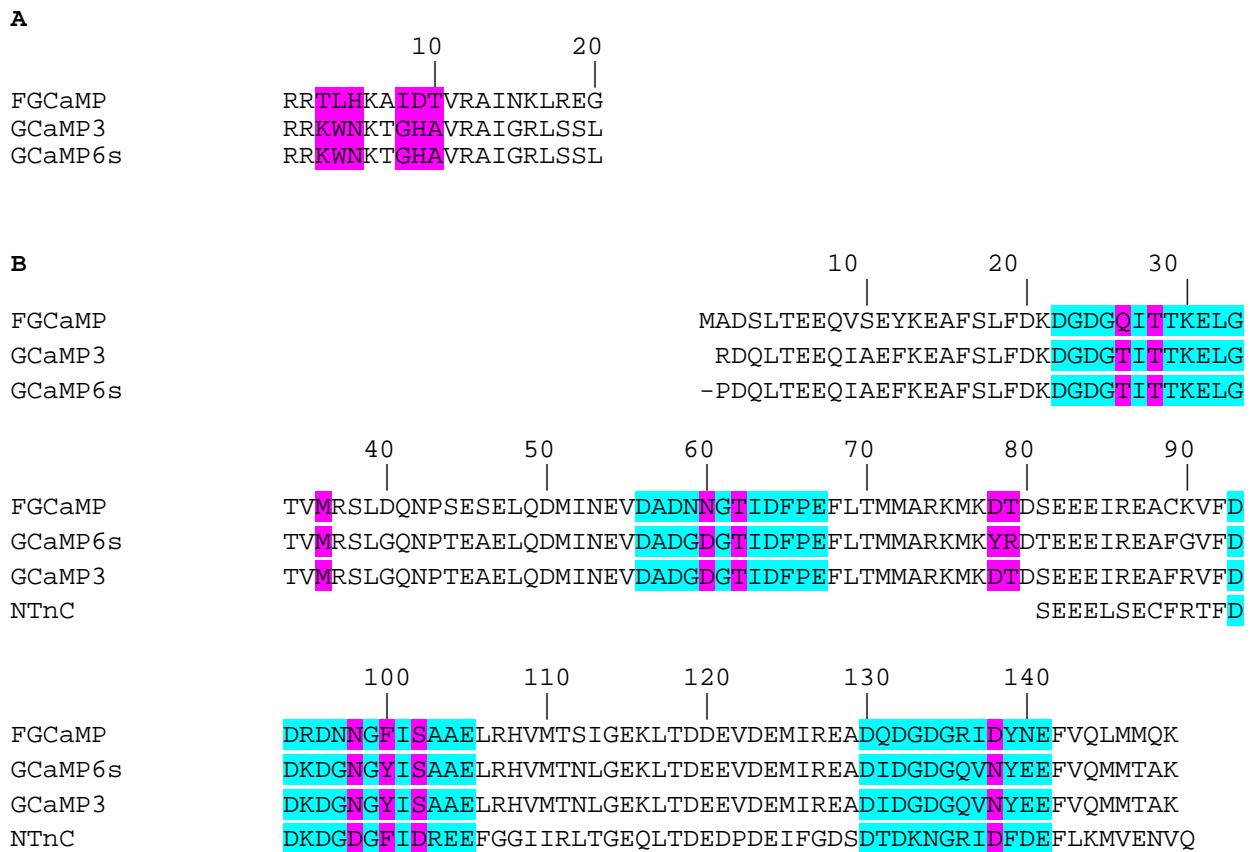

**Figure H. Alignment of the amino acid sequences of M13-like peptides and CaMs from FGCaMP and the other calcium indicators.** (A) Alignment of peptides from CaM-dependent kinase for FGCaMP, GCaMP3, and GCaMP6s indicators. Mutated randomized residues are highlighted with magenta. (B) Alignment of CaMs from FGCaMP, GCaMP3, GCaMP6s, and NTnC. Four EF1-EF4 hands responsible for calcium-binding are highlighted with cyan, mutated residues are highlighted with magenta. Alignment numbering follows that for GCaMP6s.

A

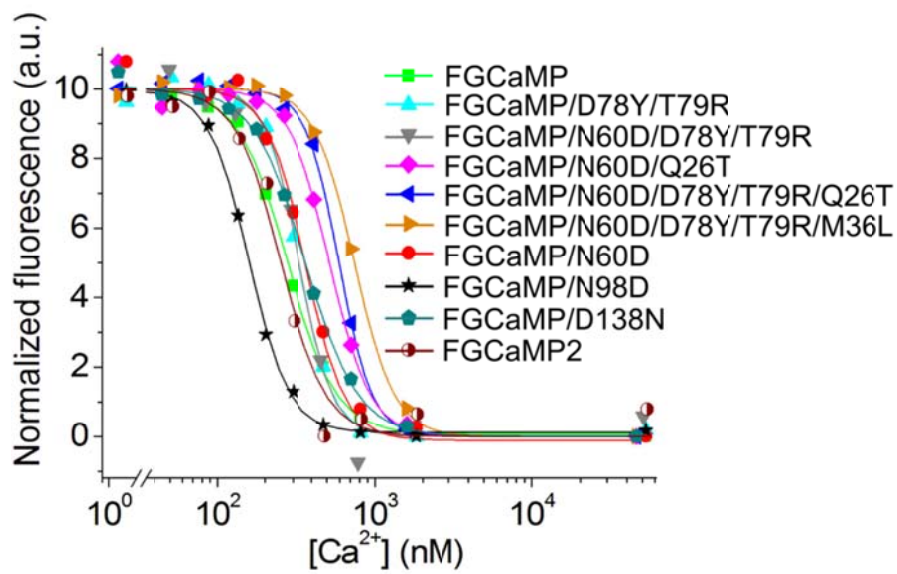

B

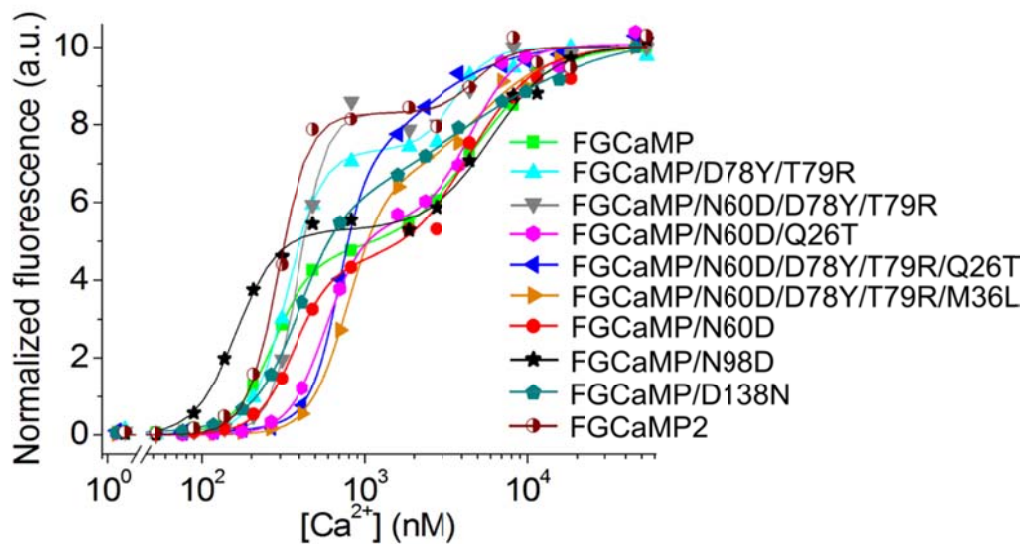

**Figure 1.  $\text{Ca}^{2+}$  titration curves for FGCaMP mutants.** (A, B)  $\text{Ca}^{2+}$  titration curves for 402- (A) and 493-forms (B) of FGCaMP mutants using excitation at 402 and 490 nm, respectively. FGCaMP2 corresponds to FGCaMP/N60D/D78Y/T79R/N98D. Alignment numbering follows that for CaM from GCaMP6s. Fluorescence is normalized to maximal and minimal values. SD corresponds to 20%.

A

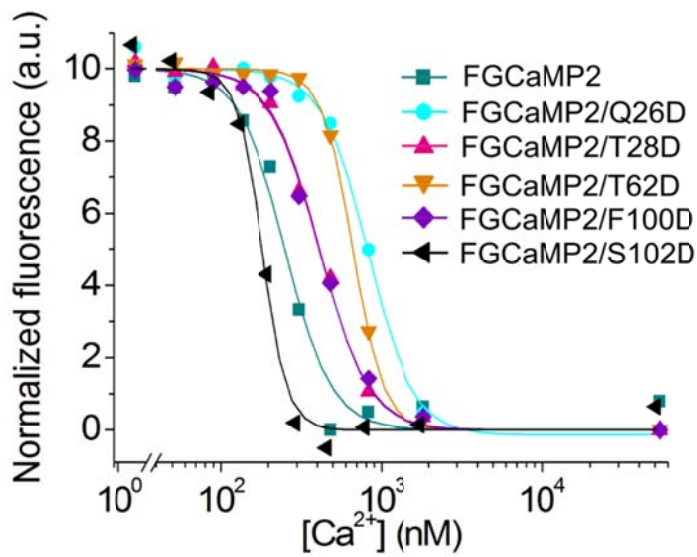

B

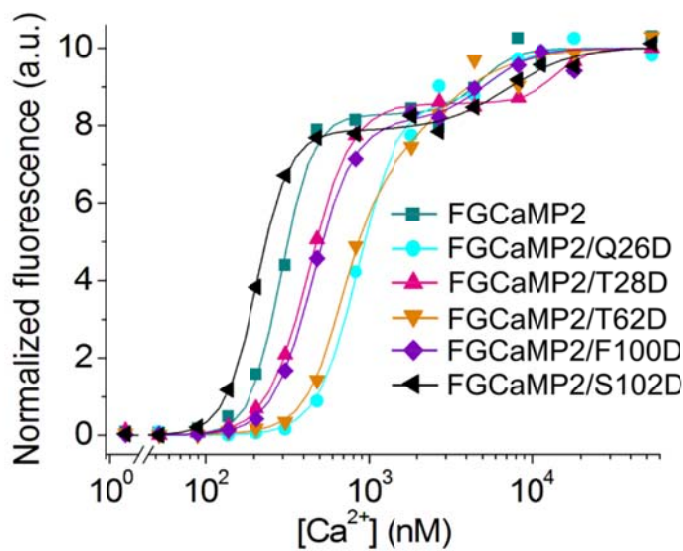

**Figure J.  $\text{Ca}^{2+}$  titration curves for FGCaMP2 mutants with mutations in CaM part.** (A, B)  $\text{Ca}^{2+}$  titration curves for 402- (A) and 493-forms (B) of FGCaMP2 mutants using 402 and 490 nm excitation, respectively. FGCaMP2 corresponds to FGCaMP/N60D/D78Y/T79R/N98D. Alignment numbering follows that for CaM from GCaMP6s. Fluorescence is normalized to maximal and minimal values. SD corresponds to 20%.

**A**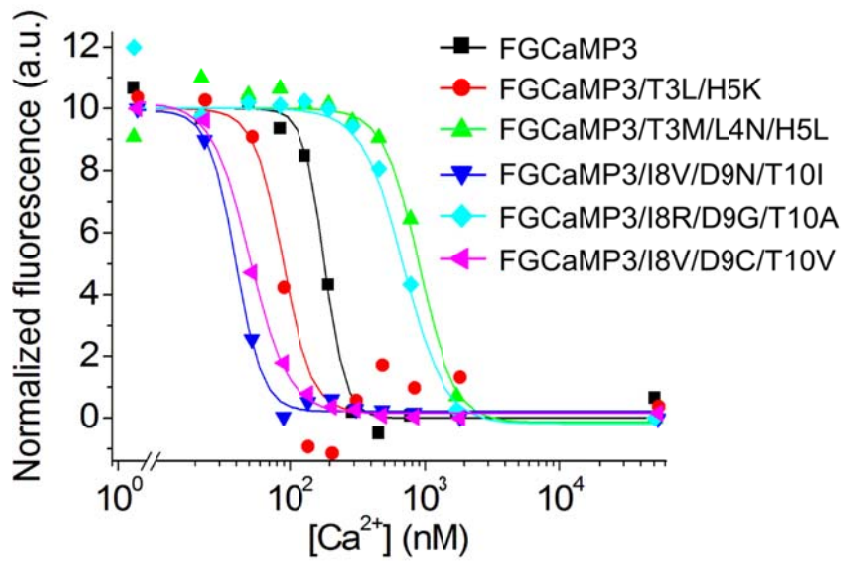**B**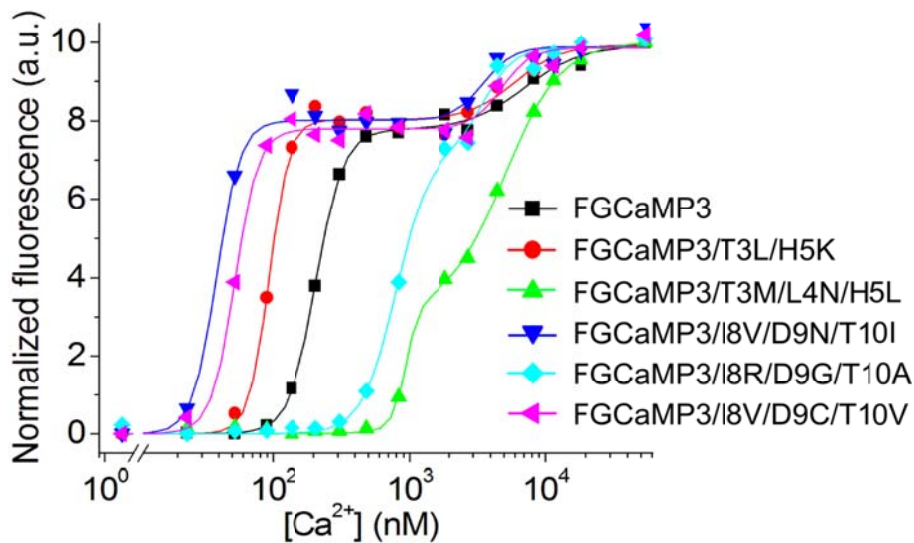

**Figure K. Ca<sup>2+</sup> titration curves for FGCaMP3 variants with mutations in the M13-like peptide.** (A, B) Ca<sup>2+</sup> titration curves for 402- (A) and 493-forms (B) of FGCaMP3 mutants using 402 and 490 nm excitation, respectively. FGCaMP3 corresponds to FGCaMP/N60D/D78Y/T79R/N98D/S102D. Alignment numbering follows that for CaM or M13 peptide from GCaMP6s. Fluorescence is normalized to minimal and maximal fluorescence values. SD corresponds to 20%.

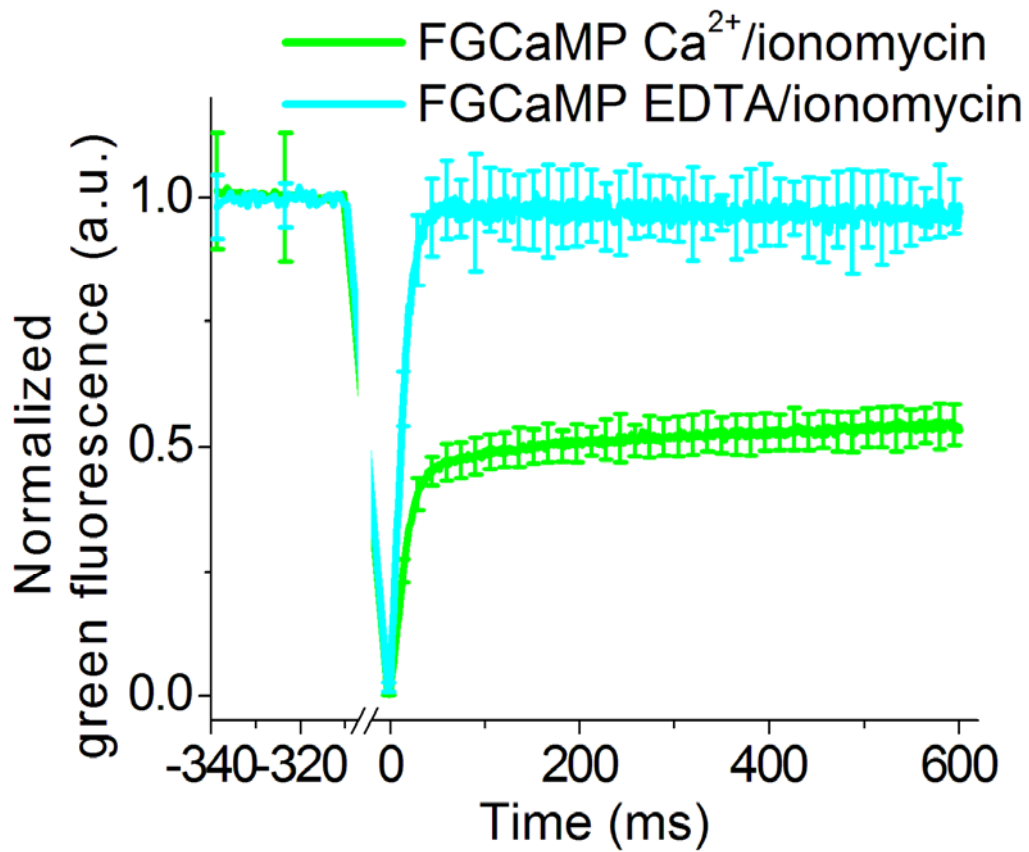

**Figure L. Reversible changes in the mobile fraction of the FGCaMP indicator at the transition from high to low Ca<sup>2+</sup> concentrations in HeLa Kyoto cells studied by FRAP experiments.** The graphs illustrate FRAP induced changes in green fluorescence of FGCaMP in response to the addition of 2 mM CaCl<sub>2</sub>/5 μM ionomycin (high Ca<sup>2+</sup> concentrations) followed by washing and addition of 1 mM EDTA/5 μM ionomycin (low Ca<sup>2+</sup> concentrations). Error bars are standard deviations shown for each 20<sup>th</sup> dot on plots.

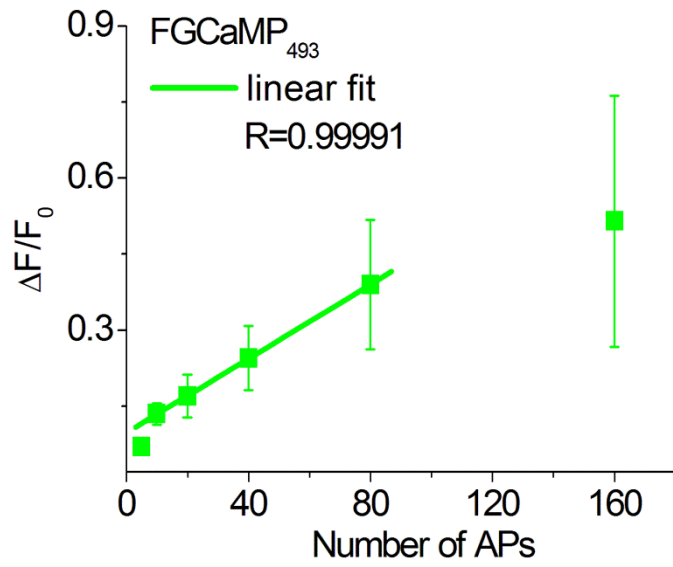

**Figure M. Fluorescence changes in response to the external electric field in cultured neurons expressing FGCaMP indicator.** Linear region is fitted to a linear equation. APs were induced by electrical pulses of 1 ms, 5 V, and 87 Hz.

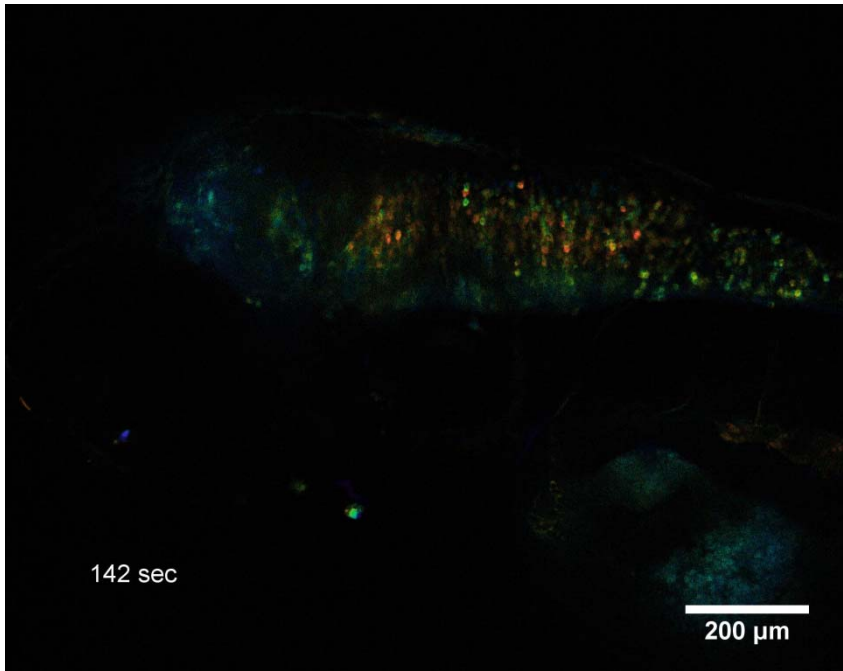

**Figure N. Confocal ratiometric calcium imaging with FGCaMP during 4-AP induced neuronal activity in paralyzed larvae embedded in ultra-low-melting agarose gel. Example of frame from S1 Video is shown.**



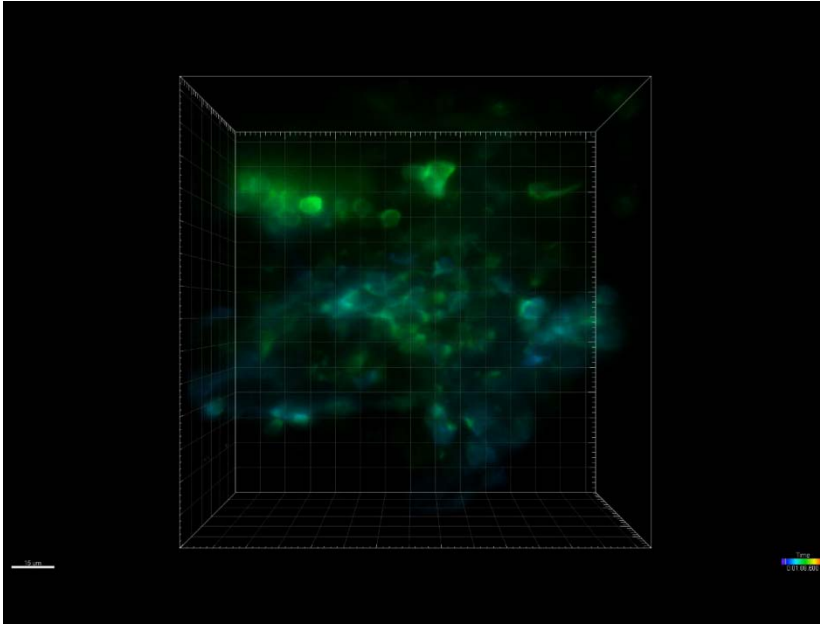

**Figure O.** Light sheet ratiometric calcium imaging with FGCaMP during 4-AP induced neuronal activity in paralyzed larvae embedded in ultra-low-melting agarose gel. Example of frame from S2 Video is shown.

**Table A. Brightness and contrasts for FGCaMP and other ratiometric green and yellow GECIs.**

| Protein                          |                         | Brightness       | Fluorescence contrast (fold) | Fluorescence Ratio (fold) |
|----------------------------------|-------------------------|------------------|------------------------------|---------------------------|
| FGCaMP                           | 402-form <sup>apo</sup> | 26               | 6.9±0.5                      | 101                       |
|                                  | 493-form <sup>sat</sup> | 49               | 14.7±0.6                     |                           |
| GEX-GECO                         | 390-form <sup>apo</sup> | 6.7 <sup>a</sup> | 1.1±0.1                      | 18                        |
|                                  | 482-form <sup>sat</sup> | 1 <sup>a</sup>   | 16.1±0.4                     |                           |
| Ratiometric-pericam <sup>b</sup> | 418-form <sup>apo</sup> | 7.2              | ND                           | 10                        |
|                                  | 494-form <sup>sat</sup> | 1.9              | ND                           |                           |
| Y-GECO <sup>c</sup>              | 523-form <sup>apo</sup> | 30               | 15                           | 200                       |
|                                  | 413-form <sup>sat</sup> | 1.2              | 18                           |                           |

<sup>a</sup> ref [1]. <sup>b</sup> ref [2]. <sup>c</sup> ref [3]

**Table B.  $K_d$  values and fluorescence contrasts for 402- and 493-forms of FGCaMP and its mutants.**

| Protein                           | 402-form         |                    | 493-form         |                        |                                |                                |
|-----------------------------------|------------------|--------------------|------------------|------------------------|--------------------------------|--------------------------------|
|                                   | $K_{d1}$<br>(nM) | Contrast<br>(fold) | $K_{d1}$<br>(nM) | $K_{d2}$<br>( $\mu$ M) | Contrast<br>$K_{d1}$<br>(fold) | Contrast<br>$K_{d2}$<br>(fold) |
| <b>FGCaMP</b>                     | 276 $\pm$ 9      | 5.1 $\pm$ 0.8      | 273 $\pm$ 7      | 4.7 $\pm$ 0.2          | 9.3 $\pm$ 0.6                  | 1.7 $\pm$ 0.1                  |
| <b>FGCaMP/N60D</b>                | 370 $\pm$ 30     | 5.5 $\pm$ 0.8      | 370 $\pm$ 40     | 4.4 $\pm$ 0.6          | 9.2 $\pm$ 0.6                  | 1.8 $\pm$ 0.1                  |
| <b>FGCaMP/N98D</b>                | 159 $\pm$ 3      | 5.8 $\pm$ 0.9      | 161 $\pm$ 8      | 6.0 $\pm$ 0.5          | 8.9 $\pm$ 0.5                  | 1.7 $\pm$ 0.2                  |
| <b>FGCaMP/D138N</b>               | 364 $\pm$ 13     | 5.4 $\pm$ 0.8      | 390 $\pm$ 9      | 5.7 $\pm$ 2.4          | 9.9 $\pm$ 0.3                  | 1.6 $\pm$ 0.1                  |
| <b>FGCaMP/N60D/Q26T</b>           | 517 $\pm$ 24     | 3.2 $\pm$ 0.5      | 575 $\pm$ 32     | 4.7 $\pm$ 0.2          | 10.1 $\pm$ 0.1                 | 1.8 $\pm$ 0.1                  |
| <b>FGCaMP/D78Y/T79R</b>           | 330 $\pm$ 8      | 3.7 $\pm$ 0.6      | 333 $\pm$ 8      | 3.6 $\pm$ 0.3          | 10.0 $\pm$ 0.4                 | 1.3 $\pm$ 0.1                  |
| <b>FGCaMP/N60D/D78Y/T79R</b>      | 332 $\pm$ 20     | 3.4 $\pm$ 0.5      | 390 $\pm$ 20     | 4.9 $\pm$ 1.1          | 10.7 $\pm$ 0.3                 | 1.2 $\pm$ 0.1                  |
| <b>FGCaMP/N60D/D78Y/T79R/Q26T</b> | 600 $\pm$ 15     | 3.4 $\pm$ 0.5      | 693 $\pm$ 17     | 3.2 $\pm$ 1.9          | 11.7 $\pm$ 0.3                 | 1.2 $\pm$ 0.1                  |
| <b>FGCaMP/N60D/D78Y/T79R/M36L</b> | 743 $\pm$ 23     | 3.4 $\pm$ 0.5      | 788 $\pm$ 47     | 4.6 $\pm$ 1.0          | 13.0 $\pm$ 0.6                 | 1.3 $\pm$ 0.1                  |
| <b>FGCaMP2<sup>a</sup></b>        | 259 $\pm$ 11     | 3.3 $\pm$ 0.5      | 292 $\pm$ 10     | 4.8 $\pm$ 1.1          | 11.3 $\pm$ 0.4                 | 1.2 $\pm$ 0.1                  |
| <b>FGCaMP2/Q26D</b>               | 824 $\pm$ 34     | 4.3 $\pm$ 0.6      | 857 $\pm$ 33     | 6.4 $\pm$ 1.5          | 10.8 $\pm$ 2                   | 1.2 $\pm$ 0.1                  |
| <b>FGCaMP2/T28D</b>               | 412 $\pm$ 13     | 4.6 $\pm$ 0.7      | 433 $\pm$ 4      | 14 $\pm$ 1             | 13 $\pm$ 1                     | 1.1 $\pm$ 0.1                  |
| <b>FGCaMP2/T62D</b>               | 665 $\pm$ 10     | 3.7 $\pm$ 0.6      | 669 $\pm$ 60     | 2.1 $\pm$ 0.8          | 9.4 $\pm$ 1.5                  | 1.4 $\pm$ 0.2                  |
| <b>FGCaMP2/F100D</b>              | 415 $\pm$ 19     | 3.7 $\pm$ 0.6      | 455 $\pm$ 16     | 5.3 $\pm$ 1.1          | 10.2 $\pm$ 0.1                 | 1.2 $\pm$ 0.1                  |
| <b>FGCaMP3<sup>a</sup></b>        | 183 $\pm$ 8      | 3.0 $\pm$ 0.5      | 208 $\pm$ 4      | 7 $\pm$ 1              | 10.9 $\pm$ 0.2                 | 1.3 $\pm$ 0.1                  |
| <b>FGCaMP3/T3L/H5K</b>            | 90 $\pm$ 20      | 2.3 $\pm$ 0.4      | 93 $\pm$ 2       | 6 $\pm$ 2              | 6.7 $\pm$ 0.3                  | 1.2 $\pm$ 0.1                  |
| <b>FGCaMP3/T3M/L4N/H5L</b>        | 910 $\pm$ 80     | 3.3 $\pm$ 0.5      | 900 $\pm$ 300    | 5.1 $\pm$ 0.3          | 4.9 $\pm$ 0.3                  | 2.2 $\pm$ 0.1                  |
| <b>FGCaMP3/I8V/D9N/T10I</b>       | 40 $\pm$ 2       | 2.7 $\pm$ 0.4      | 39 $\pm$ 3       | 3.5 $\pm$ 0.7          | 6.3 $\pm$ 0.1                  | 1.3 $\pm$ 0.1                  |
| <b>FGCaMP3/I8R/D9G/T10A</b>       | 700 $\pm$ 70     | 3.0 $\pm$ 0.5      | 790 $\pm$ 50     | 3.6 $\pm$ 0.5          | 4.6 $\pm$ 0.3                  | 1.2 $\pm$ 0.1                  |
| <b>FGCaMP3/I8V/D9C/T10V</b>       | 51 $\pm$ 2       | 4.6 $\pm$ 0.7      | 52 $\pm$ 2       | 4.8 $\pm$ 0.7          | 7.6 $\pm$ 0.4                  | 1.2 $\pm$ 0.1                  |

<sup>a</sup> FGCaMP2 and FGCaMP3 corresponds to FGCaMP/N60D/D78Y/T79R/N98D and FGCaMP2/S102D, respectively.

Alignment numbering follows that for CaM or M13 peptide from GCaMP6s.

**Table C. List of primers.**

| <b>Primer</b>            | <b>Primer sequence (5'-3')</b>                                    |
|--------------------------|-------------------------------------------------------------------|
| CaMA-rv                  | GTATATTTTCATTGCTCCCCACCCTTTCCGC                                   |
| CaMN-BglIII              | CGAGATCTATGGCCGACTCTCTGACCGAAGAGCAAG                              |
| CaMN-HindIII<br>reverse  | CCAAGCTTTTTATTTTTGCATCATGAGCTGGACGAACTCGTTG                       |
| CaMK-BglIII              | CGAGATCTATGTCCGATAAATTGTCCGAAGCCCAAATTC                           |
| CaMK-HindIII<br>reverse  | CCAAGCTTCTATTTATTAAGTAGGAGATTGGAAAATTCCTTG                        |
| M13Fc-BglIII<br>forward  | CAGAGATCTAAAAGACGGGCGATCAAGAACAAG                                 |
| M13Fc reverse            | CCGCAACACCTGGAAGACACGCGAGAGACGTCCGATGGCAAGAATCTTGTTCTGATCGCCCCG   |
| M13Fc-cpEGFP<br>forward  | GTCTTCCAGGTGTTGCGGNSNNSAACGTCTATATCAAGGCC                         |
| M13Fc-cpEGFP<br>reverse  | GGCCTTGATATAGACGTTSNNSNCCGCAACACCTGGAAGAC                         |
| cpEGFP-CaMF<br>forward   | CACAAGCTGGAGTACAACNNSNNSNNSATGGCCGACTCTCTGACCGAAGAGCAAG           |
| cpEGFP-CaMF<br>reverse   | CTTGCTCTTCGGTCAGAGAGTCGGCCATSNNSNNSNNGTTGACTCCAGCTTGTG            |
| M13Fk-BglIII<br>forward  | CAGAGATCTCGTCGAACGCTGCACAAAGCC                                    |
| M13Fk reverse            | CCCTCGCGGAGCTTGTGATGGCGCGGACGGTATCGATGGCTTTGTGCAGCGTTCG           |
| M13Fk-cpEGFP<br>forward  | CAACAAGCTCCGCGAGGGANNSNNSAACGTCTATATCAAGGCC                       |
| M13Fk-cpEGFP<br>reverse  | GGCCTTGATATAGACGTTSNNSNNTCCCTCGCGGAGCTTGTG                        |
| M13KPk-BglIII<br>forward | CAGAGATCTAAGAAAGTGGTACTCAGAAATAAG                                 |
| M13KPk reverse           | GGAGAACTTGATACATCCTGGATACTCTTCCAATTGCCAGAATCTTATTTCTGAGTACCACCTTC |
| M13KPk-cpEGFP<br>forward | GGATGTATCAAGTTCTCCGTNNSNNSAACGTCTATATCAAGGCC                      |
| M13KPk-cpEGFP<br>reverse | GGCCTTGATATAGACGTTSNNSNACGGAGAACTTGATACATCC                       |
| cpEGFP-CaMKP<br>forward  | CACAAGCTGGAGTACAACNNSNNSNNSATGTCCGATAAATTGTCCGAAGCCCAATTTTC       |
| cpEGFP-CaMKP<br>reverse  | GAAATTTGGGCTTCGGACAATTTATCGGACATSNNSNNSNNGTTGACTCCAGCTTGTG        |
| M13KPk-BglIII<br>forward | CAGAGATCTAGATCCAAGTTCAAGCAAG                                      |
| M13KPk reverse           | GTTCTTCAATCTGTTTTGCATCTTGACAATCTCGATGACTTGCTTGAACCTTGGATC         |
| M13KPk-cpEGFP<br>forward | GCAAAACAGATTGAAGAACCTCNSNNSAACGTCTATATCAAGGCC                     |
| M13KPk-cpEGFP<br>reverse | GGCCTTGATATAGACGTTSNNSNNGAGGTTCTTCAATCTGTTTTGC                    |
| FCaMP-M36L<br>forward    | CAAGGAGCTCGGCACTGTGCTGCGCTCCCTTGACCAGAAC                          |
| FCaMP-M36L<br>reverse    | GTTCTGGTCAAGGGAGCGCAGCACAGTGCCGAGCTCCTTG                          |
| FCaMP-N60D<br>forward    | GAGGTTGACGCTGACAACGACGGAACGATCGACTTCC                             |
| FCaMP-N60D               | GGAAGTCGATCGTTCCGTGCTGTCAGCGTCAACCTC                              |

|                                   |                                                                        |
|-----------------------------------|------------------------------------------------------------------------|
| <i>reverse</i>                    |                                                                        |
| <i>FCaMP-78YR forward</i>         | GATGGCTCGTAAGATGAAGTACAGAGACACCGAGGAGGAAATCCGCG                        |
| <i>FCaMP-78YR reverse</i>         | CGCGGATTTCTCCTCGGTGTCTGTACTTCATCTTACGAGCCATC                           |
| <i>FCaMP-Q26T forward</i>         | CAAGGATGGCGATGGCACGATCACCACCAAGGAGCTC                                  |
| <i>FCaMP-Q26T reverse</i>         | GAGCTCCTTGGTGGTGATCGTGCCATCGCCATCCTTG                                  |
| <i>FCaMP-N98D forward</i>         | GTCTTCGACCGCGACAACGATGGTTTTATCTCCGCCGCG                                |
| <i>FCaMP-N98D reverse</i>         | CGCGGCGGAGATAAAACCATCGTTGTCGCGGTCTGAAGAC                               |
| <i>FCaMP-D138N reverse</i>        | GAGCTGGACGAACTCGTTGTAGTTGATGCGGCCATCACCGTC                             |
| <i>FC-102D forward</i>            | GACAACGATGGTTTTATCGACGCCGCGGAGCTGCGCCAC                                |
| <i>FC-102D reverse</i>            | GTGGCGCAGCTCCGCGCGTTCGATAAAACCATCGTTGTC                                |
| <i>FC-BglII-M13NNS1 forward</i>   | GGCAGATCTATGCGTAGCCGTCGANNSNNSNNSAAAGCCATCGATACCGTC                    |
| <i>FC-BglII-M13NNS2 forward</i>   | GGCAGATCTATGCGTAGCCGTCGAACGCTGCACAAAGCCNNSNNSNNSGTCC<br>GCGCCATCAACAAG |
| <i>G-FCaMP-BamHI-NheI forward</i> | TGGGGATCCGGCTAGGCCACCATGCGTCTGAACGCTGCACAAAGCC                         |
| <i>GEX-GECO-BglII forward</i>     | CAGAGATCTATGGTTCGACTCATCACGTC                                          |
| <i>GEX-GECO-EcoRI reverse</i>     | CAGGAATTCTCACTTCGCTGTCATCATTTG                                         |

## References

1. Zhao Y, Araki S, Wu J, Teramoto T, Chang YF, Nakano M, et al. (2011) An expanded palette of genetically encoded Ca<sup>2+</sup> indicators. *Science* 333: 1888-1891.
2. Nagai T, Sawano A, Park ES, Miyawaki A (2001) Circularly permuted green fluorescent proteins engineered to sense Ca<sup>2+</sup>. *Proceedings of the National Academy of Sciences of the United States of America* 98: 3197-3202.
3. Zhao Y, Abdelfattah AS, Ruangkittisakul A, Ballanyi K, Campbell RE, Harrison DJ (2014) Microfluidic cell sorter-aided directed evolution of a protein-based calcium ion indicator with an inverted fluorescent response. *Integrative biology : quantitative biosciences from nano to macro* 6: 714-725.
